# Supplementary material for: TiO2 nanocrystals embedded in sulfur-doped porous carbon as high-performance and long-lasting anode materials for sodium-ion batteries
Source: Royal Society of Chemistry journal article supplement (doi:10.1039/c8ta05617j), 2018-01-01
Supplement: c8ta05617j1.pdf [file c8ta05617j1.pdf]

## Supporting Information

### TiO<sub>2</sub> nanocrystals-embedded sulfur-doped porous carbon as high-performance and long-life anode material for sodium-ion batteries

Junfeng Li,<sup>a</sup> Xiaojie Zhang,<sup>a,b</sup> Lu Han,<sup>a</sup> Dong Yan,<sup>a</sup> Shujin Hou,<sup>a</sup> Ting Lu,<sup>a</sup> Yefeng Yao,<sup>a</sup> Likun Pan<sup>a\*</sup>

<sup>a</sup>Shanghai Key Laboratory of Magnetic Resonance, School of Physics and Materials Science, East China Normal University, Shanghai 200062, China, Fax: +86 21 62234321; Tel: +86 21 62234132; E-mail: lkpan@phy.ecnu.edu.cn

<sup>b</sup>School of Chemical Engineering, Key Laboratory for Palygorskite Science and Applied Technology of Jiangsu, Huaiyin Institute of Technology, Jiangsu Province, Huaian 223003, China

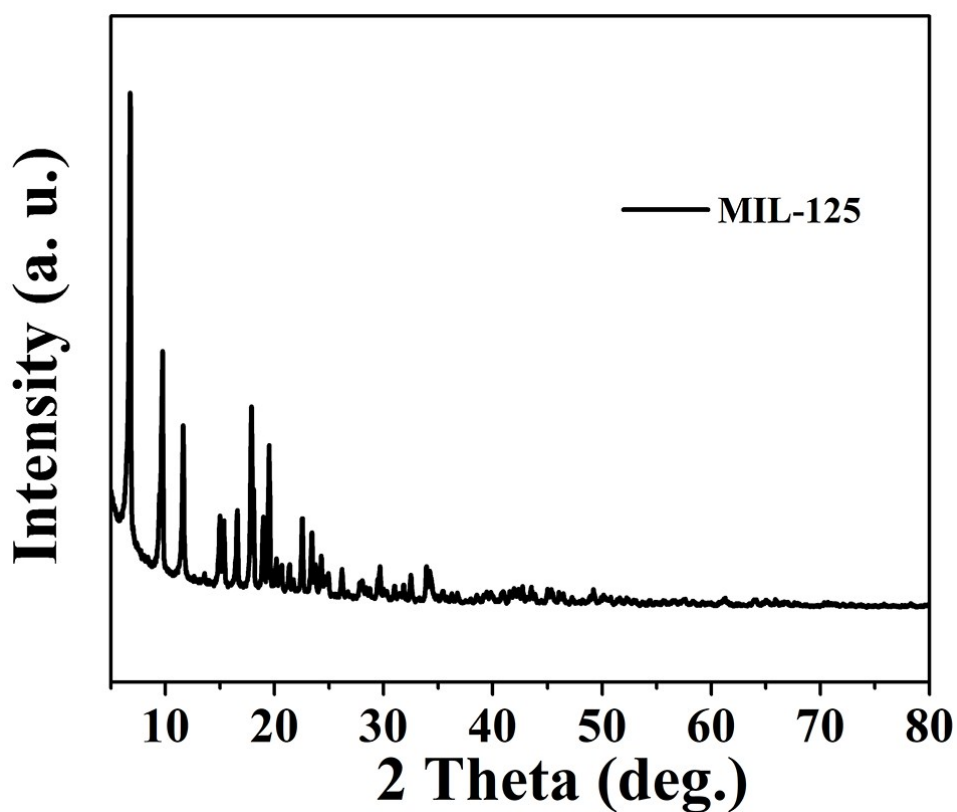

Fig. S1 XRD pattern of as-synthesized MIL-125(Ti).

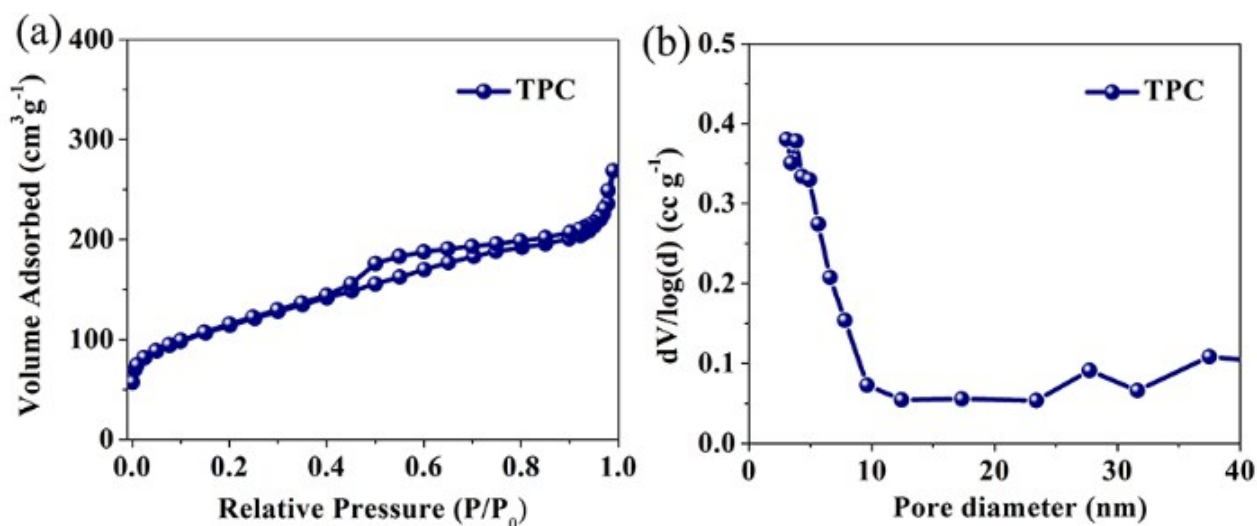

Fig. S2 (a) Nitrogen adsorption-desorption isotherms and (b) corresponding pore size distribution curves of TPC.

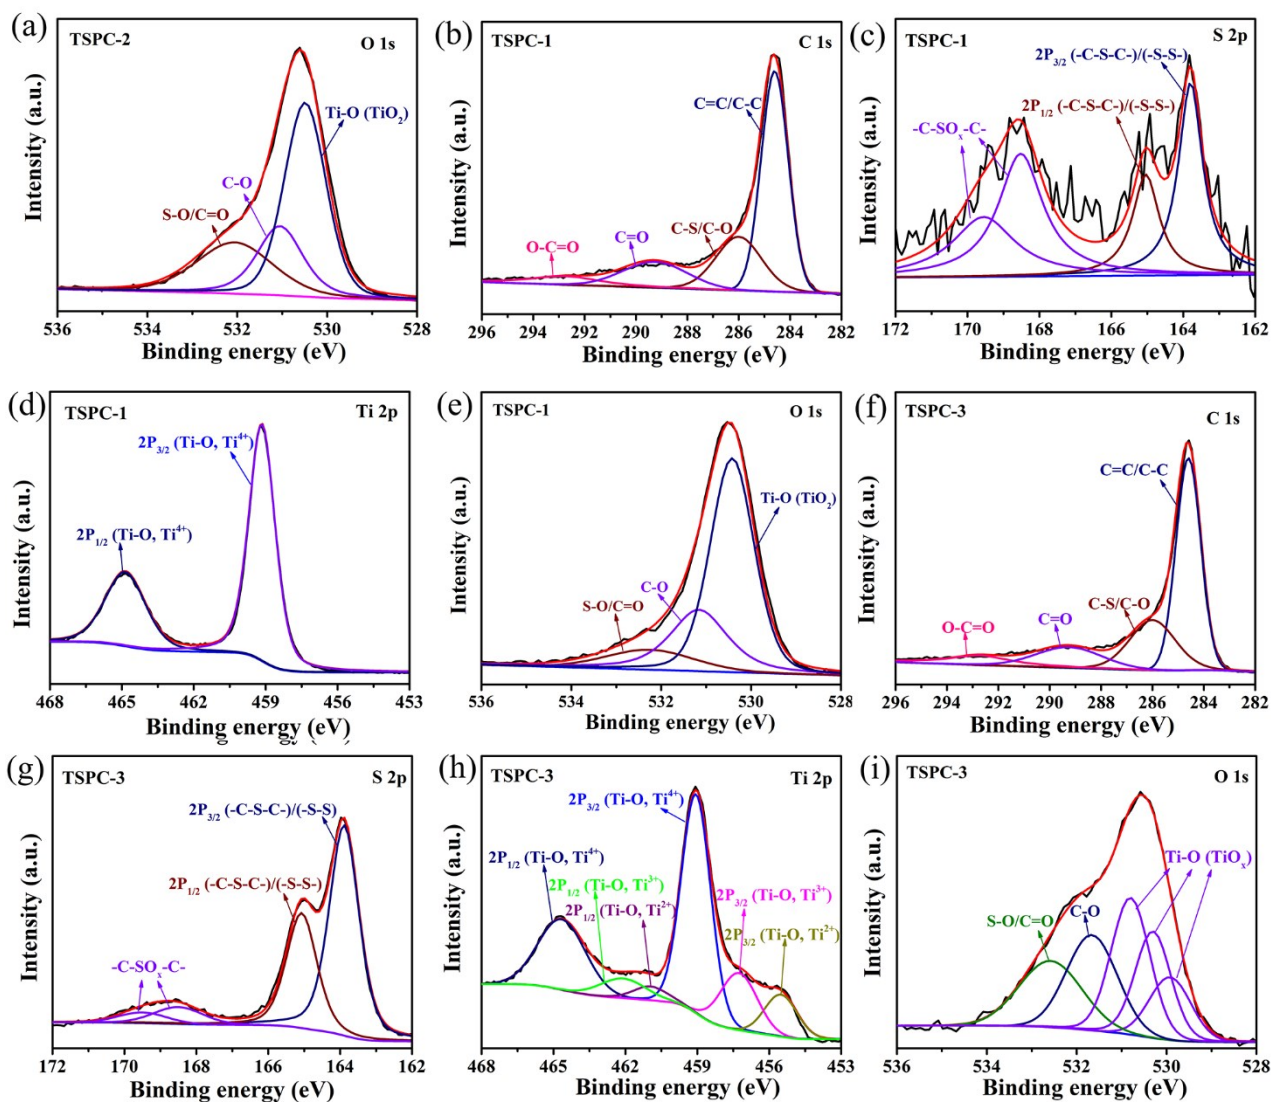

Fig. S3 XPS O 1s (a) spectra of TSPC-2. XPS C 1s (b), S 2p (c), Ti 2p (d) and O 1s (e) spectra of TSPC-1. XPS C 1s (f), S 2p (g), Ti 2p (f) and O 1s (i) spectra of TSPC-3.

The high deconvolutions of XPS C 1s, S 2p, Ti 2p, O 1s spectra of TSPC-1 and C 1s, S 2p spectra of TSPC-3 are similar to those of TSPC-2. However, for the high deconvolution of Ti 2p spectra of TSPC-3, two new fitted peaks at binding energies of 455.48 and 461.0 eV should be assigned to the Ti 2p<sub>3/2</sub> and Ti 2p<sub>1/2</sub> of Ti<sup>2+</sup>, while the other two new fitted peaks at binding energies of 457.25 and 462.2 eV should be attributed to the Ti 2p<sub>3/2</sub> and Ti 2p<sub>1/2</sub> of Ti<sup>3+</sup>.<sup>1</sup> For the high deconvolution of O 1s spectra of TSPC-3, three new fitted peaks at binding energies of 529.9, 530.3 and 530.79 eV should be ascribed to the covalent bonds of TiO<sub>x</sub> (TiO, Ti<sub>2</sub>O<sub>3</sub> and TiO<sub>2</sub>).<sup>1</sup> It should be noted that part of TiO in the outermost layer of TSPC-3 was further oxidized to Ti<sub>2</sub>O<sub>3</sub> and TiO<sub>2</sub> due to its exposure to ambient environment.<sup>2</sup> The difference between XRD and XPS results of TSPC-3 is due to the fact that the measuring depth of XPS is only several nanometers but that for XRD is much deeper.<sup>3</sup>

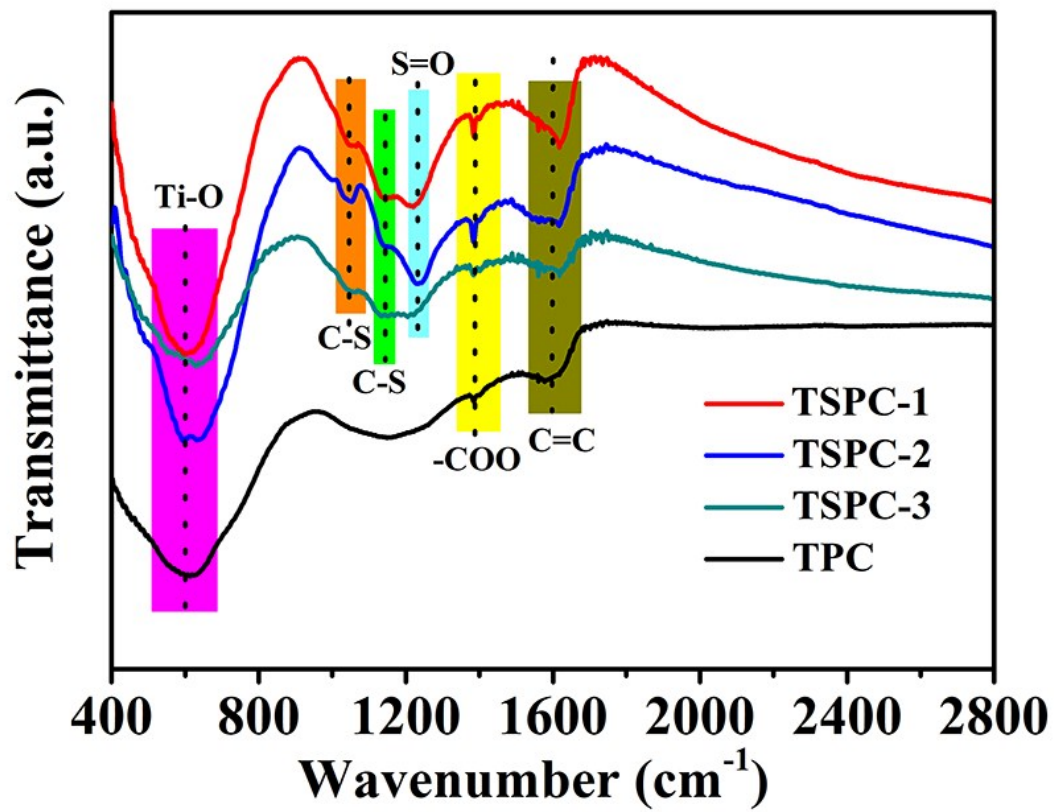

Fig. S4 FTIR spectra of TPC, TSPC-1, TSPC-2 and TSPC-3.

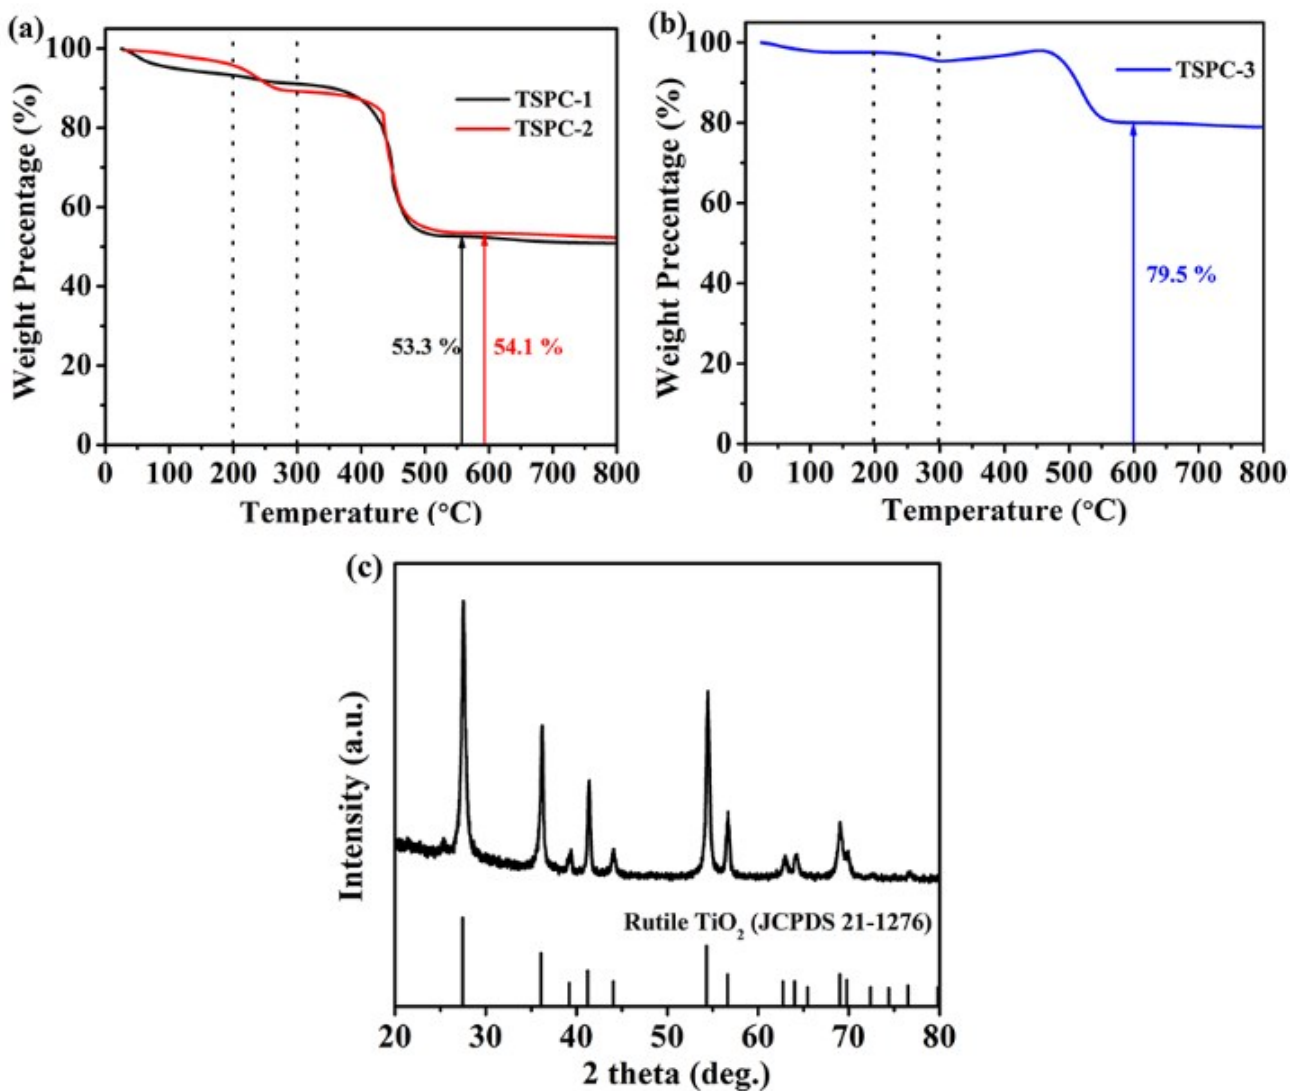

Fig. S5 (a) TG curves of TSPC-1 and TSPC-2 in air at a heating rate of 10 °C/min. (b) TG curves of TSPC-3 in air at a heating rate of 10 °C/min. (c) XRD pattern of TSPC-3 after TG test.

For TSPC-1 and TSPC-2, as sulfur-doped carbon can be completely burned in air, the resulting product will be only TiO<sub>2</sub>. Therefore, the contents of TiO<sub>2</sub> in TSPC-1 and TSPC-2 are 53.3% and 54.1%, respectively. As seen in Fig. S5c, the diffraction peaks of TSPC-3 after TG test can be indexed to rutil TiO<sub>2</sub> (JCPDS 21-1276). Therefore, the weight loss between 330 and 600 °C is attributed to both the combustion of sulfur-doped carbon and oxidation of TiO. The content of TiO in TSPC-3 can be calculated by the following equation:



$$wt.\%(TiO) = wt.\%R \times \frac{M(TiO)}{M(TiO_2)} \quad (S1)$$

where wt.%R is the weight remaining percentage after 600 °C, and M represents the molecular mass of TiO and TiO<sub>2</sub>.

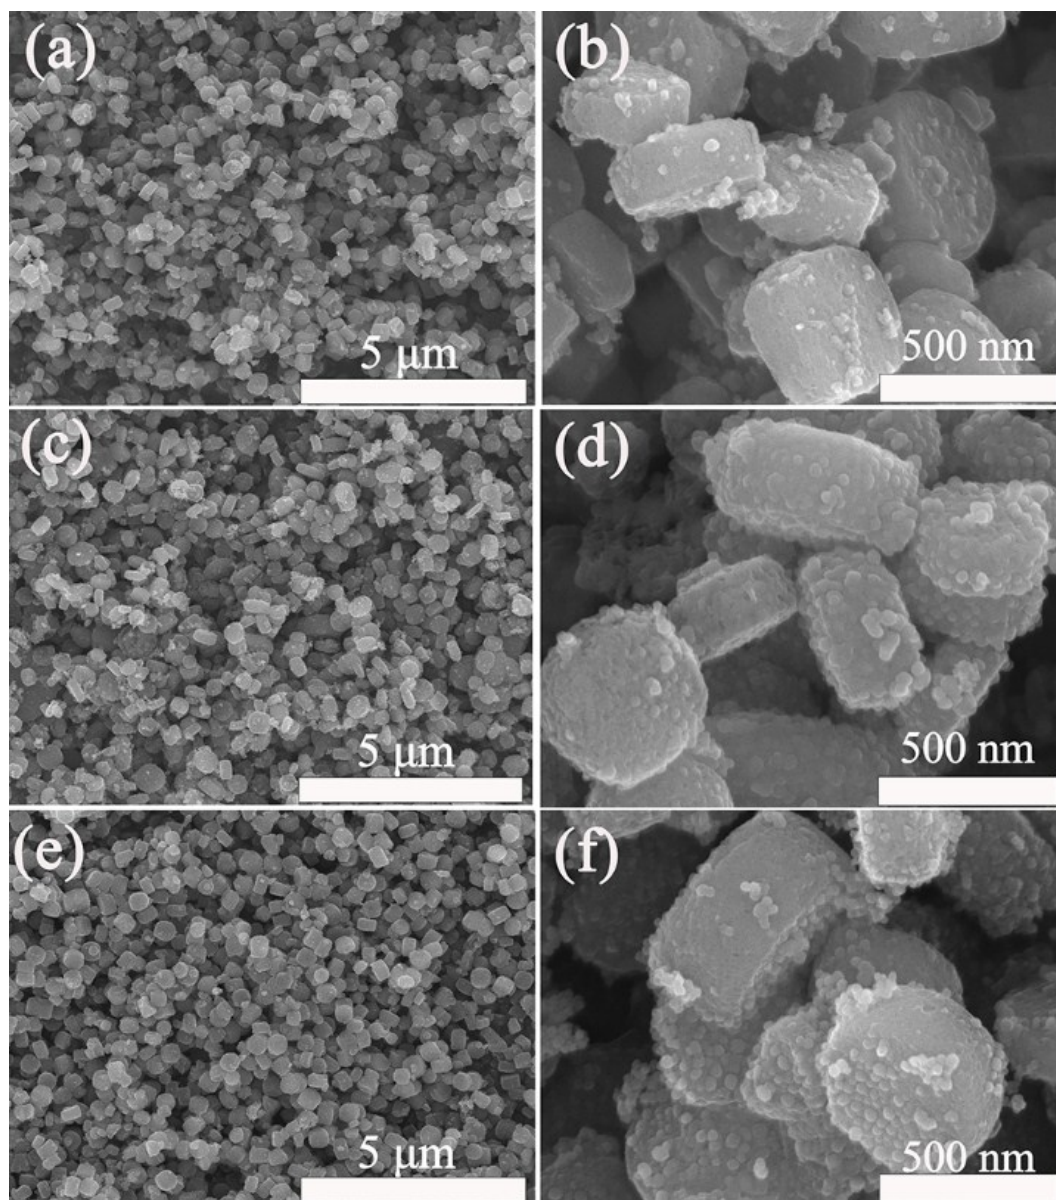

Fig. S6 FESEM images of (a,b) TPC, (c,d) TSPC-1 and (e,f) TSPC-3.

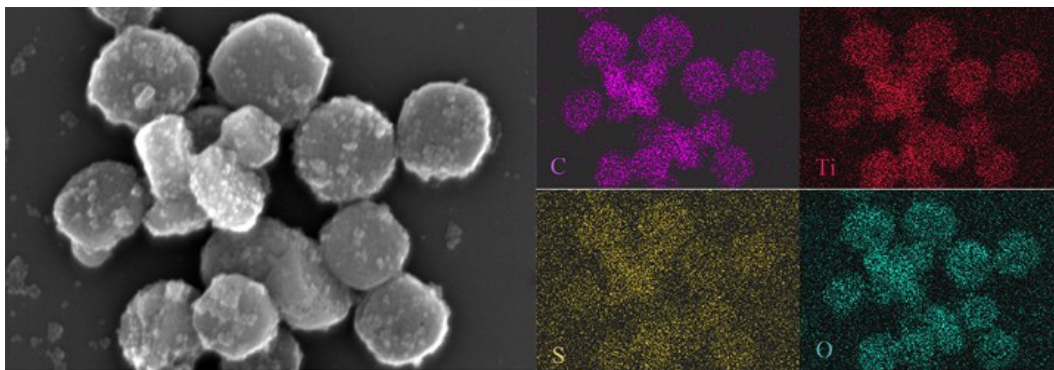

Fig. S7 EDS mapping of TSPC-2.

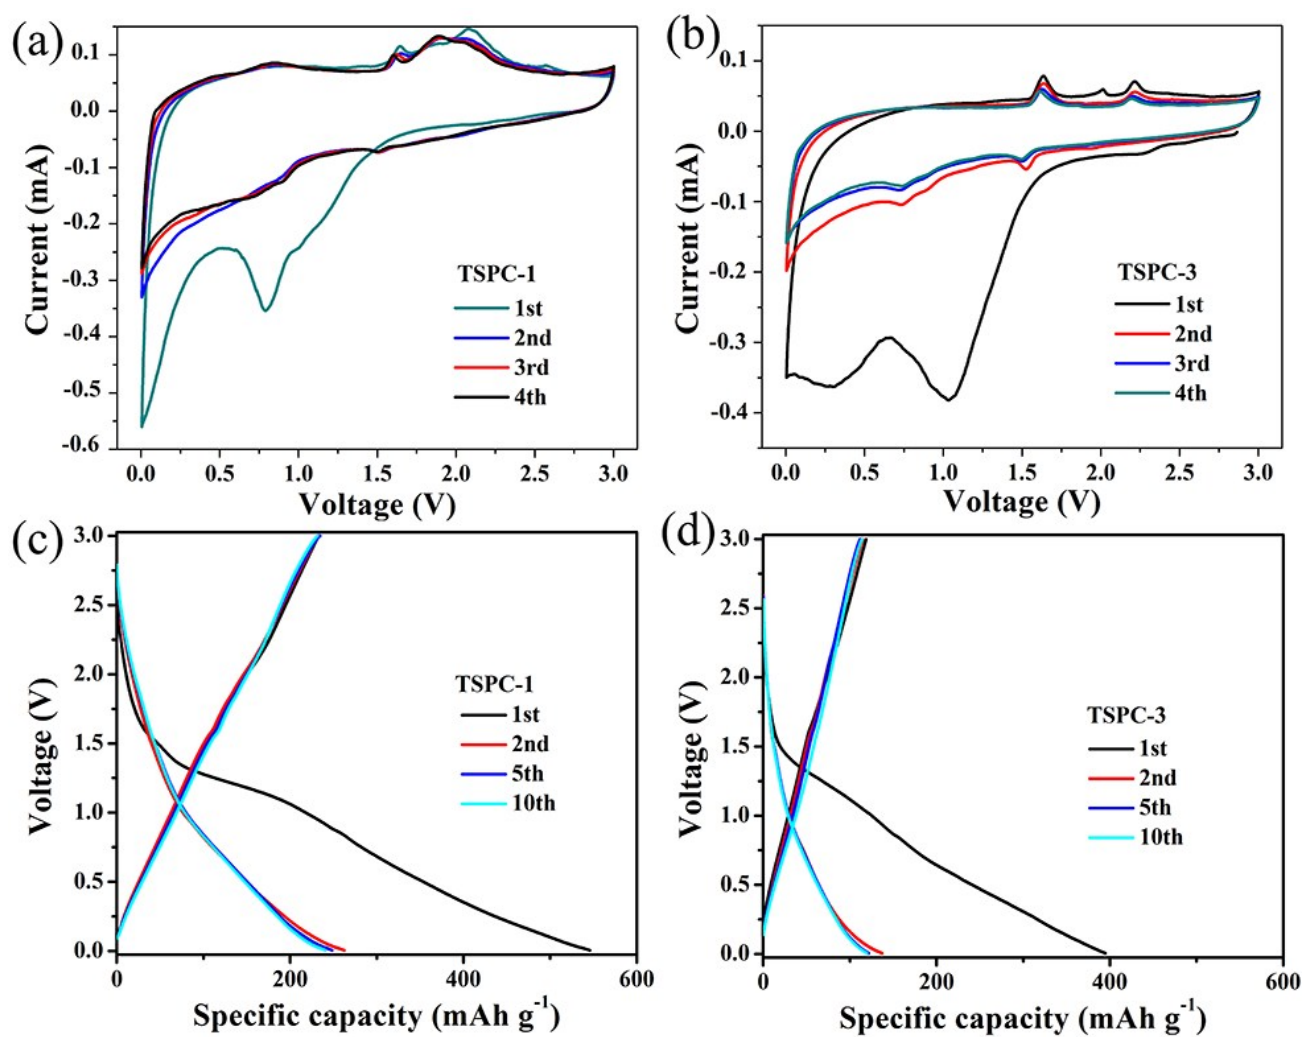

Fig. S8 CV curves of (a) TSPC-1 and (b) TSPC-3 at a scan rate of 0.2 mV s<sup>-1</sup> between 0.005 and 3 V. Charge /discharge profiles of (c) TSPC-1 and (d) TSPC-3 at different cycles at a current density of 50 mA g<sup>-1</sup>.

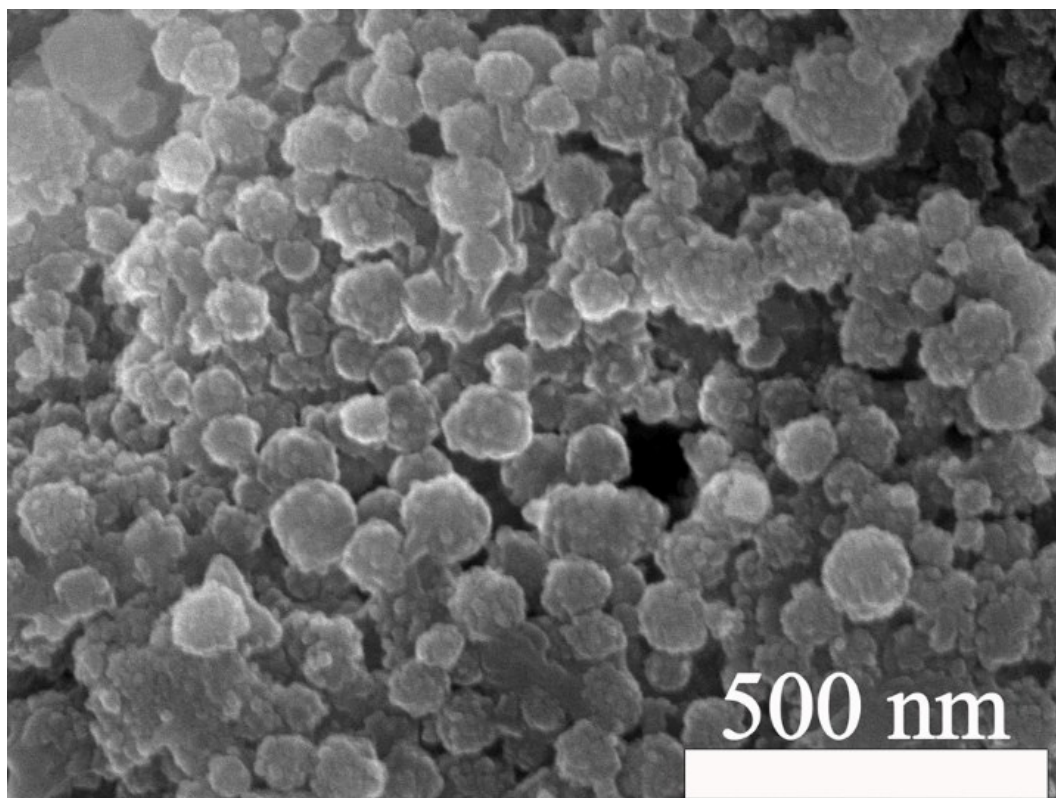

Fig. S9 FESEM images of TSPC-2 electrode after 100 cycles at a current density of 50 mA g<sup>-1</sup>.

Table S1 Specific surface areas, pore volumes and mean pore diameters of TSPC-1, TSPC-2 and TSPC-3 measured by BET method.

| Sample | Specific surface area (m <sup>2</sup> g <sup>-1</sup> ) | Pore volume (cm <sup>3</sup> g <sup>-1</sup> ) | Mean pore diameter (nm) |
|--------|---------------------------------------------------------|------------------------------------------------|-------------------------|
| TPC    | 404.5                                                   | 0.27                                           | 3.06                    |
| TSPC-1 | 343.5                                                   | 0.58                                           | 3.45                    |
| TSPC-2 | 380.2                                                   | 0.40                                           | 3.40                    |
| TSPC-3 | 401.7                                                   | 0.38                                           | 3.20                    |



Table S2 Weight percentages of carbon and sulfur in TSPC determined from the EA.

| Sample | C (wt.%) | S (wt.%) |
|--------|----------|----------|
| TSPC-1 | 25.9     | 8.3      |
| TSPC-2 | 19.7     | 14.2     |
| TSPC-3 | 18.1     | 4.3      |

Table S3 Sodium-storage performance of TSPC-2 in this work compared with other reported TiO<sub>2</sub>-based anode material in the literatures.

| Anode                                           | Discharge capacity<br>(mA h g <sup>-1</sup> ) | Current Density<br>(mA g <sup>-1</sup> ) | Cycle number<br>(cycles) | Reference |
|-------------------------------------------------|-----------------------------------------------|------------------------------------------|--------------------------|-----------|
| TiO <sub>2</sub> /C nanofibers                  | 237.1                                         | 200                                      | 1000                     | Ref. S4   |
| C-TiO <sub>2</sub> microspheres                 | 155                                           | 20                                       | 50                       | Ref. S5   |
| Hybrid TiO <sub>2</sub> @graphene               | 186.6                                         | 100                                      | 100                      | Ref. S6   |
| Carbon-coated TiO <sub>2</sub> nanoparticles    | 210.7                                         | 30                                       | 100                      | Ref. S7   |
| Anatase/bronze TiO <sub>2</sub> /C              | 143                                           | 167.5                                    | 300                      | Ref. S8   |
| Carbon-coated rutile TiO <sub>2</sub>           | 175                                           | 84                                       | 200                      | Ref. S9   |
| Graphene@nitrogen doped carbon@TiO <sub>2</sub> | 263                                           | 50                                       | 200                      | Ref. S10  |
| Anatase TiO <sub>2</sub> @C composites          | 167.4                                         | 100                                      | 110                      | Ref. S11  |
| Graphene-supported TiO <sub>2</sub> nanospheres | 208                                           | 20                                       | 200                      | Ref. S12  |
| TSPC-2                                          | 323                                           | 50                                       | 100                      | This work |
| Anatase/bronze TiO <sub>2</sub> /C              | 104                                           | 3350                                     | 6000                     | Ref. S8   |
| Carbon-coated rutile TiO <sub>2</sub>           | 70                                            | 3360                                     | 2000                     | Ref. S9   |

|                                                  |       |      |      |           |
|--------------------------------------------------|-------|------|------|-----------|
| Graphene@nitrogen doped carbon@TiO <sub>2</sub>  | 108.8 | 1000 | 5000 | Ref. S10  |
| Anatase TiO <sub>2</sub> @C composites           | 148   | 500  | 500  | Ref. S11  |
| Nitrogen doped graphene grafted TiO <sub>2</sub> | 425.6 | 2000 | 200  | Ref. S13  |
| TSPC-2                                           | 207.6 | 2500 | 1500 | This work |

---

## References

- [S1] H. Yang and J.-G. Duh, *RSC Adv.*, 2016, **6**, 37160-37166.
- [S2] H. Qian, W. Zhou and H. Zheng, *Surf. Rev. Lett.*, 2008, **15**, 675-679.
- [S3] X. Zheng, M. Huang and C. Ding, *Biomaterials*, 2000, **21**, 841-849.
- [S4] Y. Xiong, J. Qian, Y. Cao, X. Ai and H. Yang, *ACS Appl. Mater. Interfaces*, 2016, **8**, 16684-16689.
- [S5] S.-M. Oh, J.-Y. Hwang, C. S. Yoon, J. Lu, K. Amine, I. Belharouak and Y.-K. Sun, *ACS Appl. Mater. Interfaces*, 2014, **6**, 11295-11301.
- [S6] H. Liu, K. Cao, X. Xu, L. Jiao, Y. Wang and H. Yuan, *ACS Appl. Mater. Interfaces*, 2015, **7**, 11239-11245.
- [S7] Y. Ge, H. Jiang, J. Zhu, Y. Lu, C. Chen, Y. Hu, Y. Qiu and X. Zhang, *Electrochim. Acta*, 2015, **157**, 142-148.
- [S8] C. Chu, J. Yang, Q. Zhang, N. Wang, F. Niu, X. Xu, J. Yang, W. Fan and Y. Qian, *ACS Appl. Mater. Interfaces*, 2017, **9**, 43648-43656.
- [S9] G. Zou, J. Chen, Y. Zhang, C. Wang, Z. Huang, S. Li, H. Liao, J. Wang and X. Ji, *J. Power Sources*, 2016, 325, 25-34.
- [S10] Z. Zhang, Y. An, X. Xu, C. Dong, J. Feng, L. Ci and S. Xiong, *Chem. Commun.*, 2016, **52**, 12810-12812.
- [S11] X. Shi, Z. Zhang, K. Du, Y. Lai, J. Fang and J. Li, *J. Power Sources*, 2016, **330**, 1-6.
- [S12] Y. Xiong, J. Qian, Y. Cao, X. Ai and H. Yang, *J. Mater. Chem. A*, 2016, **4**, 11351-11356.
- [S13] G. Qin, X. Zhang and C. Wang, *J. Mater. Chem. A*, 2014, **2**, 12449-12458.
